# Supplementary material for: Predictive Analytics with Strategically Missing Data
Source: Atypon-hosted journal article supplement (doi:10.1287/ijoc.2019.0947), 2020-05-22
Supplement: ijoc.2019.0947.sm1.pdf [file ijoc.2019.0947.sm1.pdf]

# Predictive Analytics with Strategically Missing Data

Juheng Zhang

Department of Operations and Information Systems  
University of Massachusetts Lowell  
Email: juheng\_zhang@uml.edu

Xiaoping Liu

D'Amore-McKim School of Business  
Northeastern University  
Email: xia.liu@northeastern.edu

Xiao-Bai Li (corresponding author)

Department of Operations and Information Systems  
University of Massachusetts Lowell  
Email: xiaobai\_li@uml.edu

## Appendix: Proofs of Theorems and Corollaries

In this online supplementary appendix, for convenience we use  $\mathbf{w}_r \geq \mathbf{0}$  to refer to the situation where the coefficients of all *optional* attributes for the  $r$ th reduced model are all nonnegative; i.e.,  $\mathbf{w}_r \geq \mathbf{0}$  is equivalent to  $w_{rj} \geq 0, j = M - m + 1, \dots, M$ . Also, recall that  $W^+$  is the set of indices of the reduced models whose coefficients of the optional attributes are nonnegative; that is,  $W^+ = \{r | \mathbf{w}_r \geq \mathbf{0}\}$ .

**Theorem 1.** *With nonnegative  $\mathbf{x}$ , the optimal objective value of problem (7) is*

$$y_a^* = \max \{K_r | r \in W^+\}, \text{ where } K_r = -\varepsilon + \left(\sum_{j=1}^{M-m} w_{rj}x_{aj} + b_r\right). \quad (\text{A.1})$$

**Proof:** It follows from constraints in (7b) that  $y_a \geq K_r + \sum_{j=M-m+1}^M w_{rj}x_{aj}, \forall r$ . If  $w_{rj} < 0$ , then  $w_{rj}x_{aj}$  can be arbitrarily small by allowing an arbitrarily large positive value for  $x_{aj}$ . Since  $K_r$  is a fixed value,  $K_r + \sum_{j=M-m+1}^M w_{rj}x_{aj}$  can be arbitrarily small too. Thus,  $y_a$  cannot be bounded by a constraint with  $w_{rj} < 0$ ; that is, the optimal value  $y_a^*$  can only be found from the set of constraints specified in  $W^+$ .

Next, we use proof by contradiction to establish (A.1). Suppose  $\exists y'_a: y'_a < y_a^*$  and  $y'_a$  satisfies (7b); i.e.,

$$y'_a \geq K_r + \sum_{j=M-m+1}^M w_{rj} x_{aj}, \quad \forall r \in \{0, 1, \dots, R\} \quad (\text{A.2})$$

It follows from (A.1) and  $y'_a < y_a^*$  that  $y'_a < \max\{K_r | r \in W^+\}$ . For the  $r$  with  $\max\{K_r | r \in W^+\}$ , since  $\mathbf{w}_r \geq \mathbf{0}$  and  $\mathbf{x} \geq \mathbf{0}$ , we have  $\sum_{j=M-m+1}^M w_{rj} x_{aj} \geq 0$ . Therefore,

$$y'_a < \max\{K_r | r \in W^+\} + \sum_{j=M-m+1}^M w_{rj} x_{aj}. \quad (\text{A.3})$$

Equation (A.3) contradicts (A.2). QED

**Corollary 1.** *If every model except the fully reduced model, i.e., the  $R$ th model, in (7b) has some negative coefficients on the optional attributes, then  $y_a^* = K_R$ .*

**Proof:** For  $\forall r = 0, \dots, R-1, w_{rj} < 0$  for some  $j \in \{M-m+1, \dots, M\}$ . Then  $\{r | \mathbf{w}_r \geq \mathbf{0}\} = \{R\}$ , since  $\mathbf{w}_R = \mathbf{0}$ , i.e., the  $R$ th reduced model does not have any optional attribute. So,  $\max\{K_r | r \in W^+\} = \max\{K_r | r = R\} = K_R$ ; that is,  $y_a^* = K_R$ . QED

**Corollary 2.** *For nonnegative  $\mathbf{x}$ , the optimal solutions  $\mathbf{x}_a^*$  of problem (7) is not unique unless  $\mathbf{x}_a^*$  is determined by the full model.*

**Proof:** By (7b), the solution  $x_{aj}^*, j = M-m+1, \dots, M$ , satisfy

$$\sum_{j=M-m+1}^M w_{rj} x_{aj}^* \leq y_a^* - K_r, \quad r = 0, 1, \dots, R.$$

For nonnegative  $\mathbf{x}$ , by Theorem 1,  $y_a^* = \max\{K_r | r \in W^+\}$ . Thus,  $y_a^* - K_r \geq 0$ .

Case 1: If  $\mathbf{x}_a^*$  is determined by the full model ( $r = 0$ ), then no component of  $\mathbf{w}_0$  can be zero (i.e., the coefficient of any optional attribute in the full model must be nonzero). As a result,  $\mathbf{w}_0 > \mathbf{0}$  by Theorem 1. Since  $y_a^* = K_0$ , we have  $\sum_{j=M-m+1}^M w_{0j} x_{aj}^* \leq 0$ . Given that  $\mathbf{x}_a^* \geq \mathbf{0}$  and  $\mathbf{w}_0 > \mathbf{0}$ , there is only one solution satisfying this condition:  $x_{aj}^* = 0, j = M-m+1, \dots, M$ .

Case 2: If  $\mathbf{w}_r \geq \mathbf{0}, \forall r = 1, \dots, R$ , but  $\mathbf{w}_0 \not\geq \mathbf{0}$ , then  $y_a^* \neq K_0$ . In this case, we have at least one attribute  $x_{aj}^*$  such that its associated  $w_{rj} \neq 0, r \in \{r' | y_a^* - K_{r'} > 0\}$ . We can set

$$x_{aj}^* \leq \min \left\{ \frac{1}{w_{rj}} (y_a^* - K_r), r \in \{r' | y_a^* - K_{r'} > 0\} \text{ and } r' \in \{1, \dots, R\} \right\} \text{ and } x_{ak}^* = 0, k \neq j, k \in$$

$\{M - m + 1, \dots, M\}$ . Thus,  $\mathbf{x}_a^*$  is not unique, since  $x_{aj}^*$  can take any value from zero to a positive

number,  $\min \left\{ \frac{1}{w_{rj}} (y_a^* - K_r), r \in \{r' \mid y_a^* - K_{r'} > 0\} \text{ and } r' \in \{1, \dots, R\} \right\}$ .

Case 3: If  $\exists w_{rj} < 0, j \in \{M - m + 1, \dots, M\}, r \in \{0, 1, \dots, R\}$ , then for the corresponding attribute  $x_{aj}^*$ , we have

$$w_{rj} x_{aj}^* \leq y_a^* - K_r - \sum_{k \neq j, k \in \{M-m+1, \dots, M\}} w_{rk} x_{ak}^*, \quad r = 0, 1, \dots, R$$

$$x_{aj}^* \geq \frac{1}{w_{rj}} \left\{ y_a^* - K_r - \sum_{k \neq j, k \in \{M-m+1, \dots, M\}} w_{rk} x_{ak}^* \right\}, \quad r = 0, 1, \dots, R$$

Since  $\mathbf{x}$  is nonnegative, we have

$$x_{aj}^* \geq \max_r \left\{ 0, \frac{1}{w_{rj}} \left\{ y_a^* - K_r - \sum_{k \neq j, k \in \{M-m+1, \dots, M\}} w_{rk} x_{ak}^* \right\} \right\}$$

Setting  $x_{ak}^* = 0, k \neq j, k \in \{M - m + 1, \dots, M\}$ , since  $w_{rj} < 0$  and  $y_a^* - K_r \geq 0$ , we have

$$\frac{1}{w_{rj}} \left\{ y_a^* - K_r - \sum_{k \neq j, k \in \{M-m+1, \dots, M\}} w_{rk} x_{ak}^* \right\} = \frac{1}{w_{rj}} \{y_a^* - K_r\} \leq 0$$

Therefore,  $x_{aj}^* \geq 0$  and the optimal solutions  $\mathbf{x}_a^*$  are not unique. QED

**Theorem 2.** When  $\mathbf{x}_a^0$  is inferior to  $\mathbf{x}_a^*$ , the optimal solution  $\mathbf{x}_a^*$  minimizes the sum of absolute imputation errors while preserving the decision maker's decision models. That is, for any data point  $\mathbf{x}'_a$  that satisfies the decision models, we have  $\sum_{j=M-m+1}^M |x_{aj}^* - x_{aj}^0| \leq \sum_{j=M-m+1}^M |x'_{aj} - x_{aj}^0|$ .

**Proof:** Problem (8) has the following objective function:

$$\min \left\{ \sum_{w_j > 0, j \in \{M-m+1, \dots, M\}} x_{aj} - \sum_{w_j < 0, j \in \{M-m+1, \dots, M\}} x_{aj} \right\}$$

Since  $\mathbf{x}_a^0$  is a fixed point, we can write the objective function as

$$\min \left\{ \sum_{w_j > 0, j \in \{M-m+1, \dots, M\}} (x_{aj} - x_{aj}^0) - \sum_{w_j < 0, j \in \{M-m+1, \dots, M\}} (x_{aj} - x_{aj}^0) \right\}$$

or equivalently,

$$\min \left\{ \sum_{j=M-m+1}^M \text{sign}(w_j)(x_{aj} - x_{aj}^0) \right\}$$

So,  $\mathbf{x}_a^*$  is the optimal solution to the above function. That is, for any data point  $\mathbf{x}'_a$  that satisfies the model (8) constraints, we have

$$\sum_{j=M-m+1}^M \text{sign}(w_j)(x_{aj}^* - x_{aj}^0) < \sum_{j=M-m+1}^M \text{sign}(w_j)(x'_{aj} - x_{aj}^0) \quad (\text{A.4})$$

When  $\mathbf{x}_a^0$  is inferior to  $\mathbf{x}_a^*$ , we have  $x_{aj}^0 < x_{aj}^*$  if  $w_j > 0$ , and  $x_{aj}^0 > x_{aj}^*$  if  $w_j < 0$  (note that  $w_j \neq 0$  by definition). That is,  $\text{sign}(w_j)(x_{aj}^* - x_{aj}^0)$  is always positive. So, the left-hand side of (A.4) is

$$\sum_{j=M-m+1}^M \text{sign}(w_j)(x_{aj}^* - x_{aj}^0) = \sum_{j=M-m+1}^M |x_{aj}^* - x_{aj}^0| \quad (\text{A.5})$$

For the right-hand side of (A.4), regardless of values of  $x'_{aj}$  and  $x_{aj}^0$ , it is always true that

$$\sum_{j=M-m+1}^M \text{sign}(w_j)(x'_{aj} - x_{aj}^0) \leq \sum_{j=M-m+1}^M |x'_{aj} - x_{aj}^0| \quad (\text{A.6})$$

It follows from (A.4), (A.5) and (A.6) that

$$\sum_{j=M-m+1}^M |x_{aj}^* - x_{aj}^0| \leq \sum_{j=M-m+1}^M |x'_{aj} - x_{aj}^0|. \quad \text{QED}$$

**Theorem 3** When  $\mathbf{x}_a^0$  is inferior to  $\mathbf{x}_a^*$ , the optimal SMILE solution  $\mathbf{x}_a^*$  minimizes the sum of absolute imputation errors while preserving the decision maker's decision models.

**Proof.** Let  $y_a^*$  be the value obtained by substituting  $\mathbf{x}_a^0$ 's known values ( $x_{a,1}^0, \dots, x_{a,M-m}^0$ ) into equation  $Y_m$  in the SMI algorithm ( $y_a^*$  is subsequently used to find  $x_{a,M-m+1}^*, \dots, x_{a,M-m+j-1}^*$ , in the algorithm). Consider the first error term in the sum of errors regarding  $x_{a,M-m+1}^0$ . Let

$y_{a,m-1}$  be the value obtained by substituting the true values  $x_{a,1}^0, \dots, x_{a,M-m+1}^0$ , into equation  $Y_{m-1}$ . When  $\mathbf{x}_a^0$  is inferior to  $\mathbf{x}_a^*$ , we have  $x_{a,M-m+1}^0 < x_{a,M-m+1}^*$  if  $w_{M-m+1} > 0$ , and  $x_{a,M-m+1}^0 > x_{a,M-m+1}^*$  if  $w_{M-m+1} < 0$ . Since  $x_{a,M-m+1}^*$  satisfies both constraints  $Y_{m-1}$  and  $Y_m$ , any value between  $x_{a,M-m+1}^*$  and  $x_{a,M-m+1}^0$ , say  $x'_{a,M-m+1}$ , will not satisfy constraint  $Y_m$  (the corresponding  $y'_a$  will be between  $y_a^*$  and  $y_{a,m-1}$ ). So, the value closest to  $x_{a,M-m+1}^0$  while satisfying both constraints is  $x_{a,M-m+1}^*$ . We can apply the same method of proof to the other error terms in the sum of errors by iteratively comparing  $Y_{m-j}$  with  $Y_{m-j+1}$  ( $j = 1, \dots, m$ ) defined in the SMI algorithm. QED
